# Supplementary material
Source: publisher site journal article supplement (https://www.spandidos-publications.com/3323/downloadSupplementary)

Figure S1. Wet/dry weight ratio and inflammation were evaluated in intestinal and lung tissue samples. Wet/dry weight ratio and relative expression levels of IL-1 $\beta$ , TNF- $\alpha$ , INF- $\gamma$  and TGF- $\beta$ 1 were analyzed in (A) the normal and sham groups and (B) the normal, normal-NC and normal-miR-146a groups (n=6). miR, microRNA; ns, not significant; I/R, ischemia/reperfusion; NC, negative control.

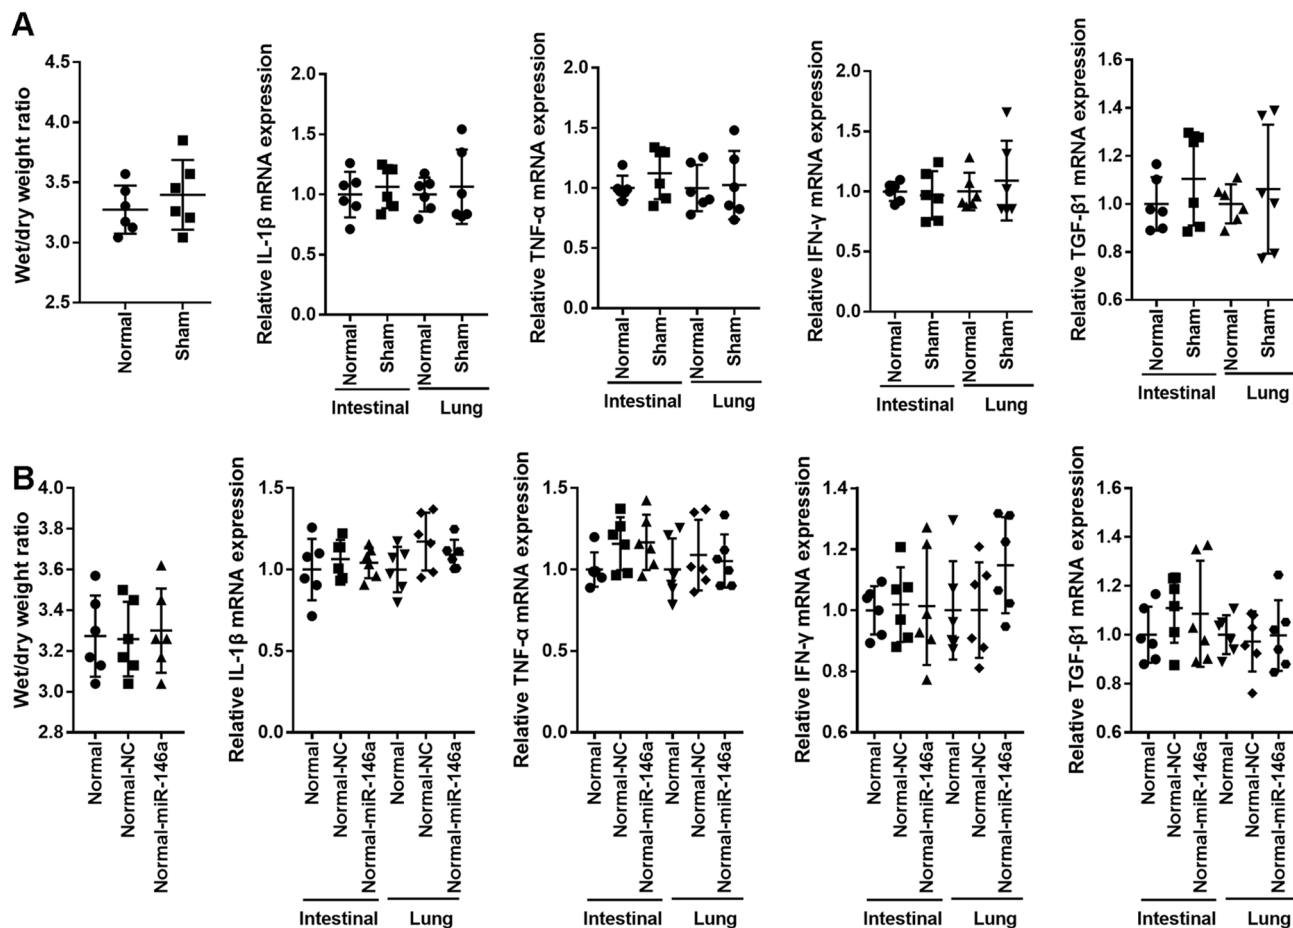

Figure S2. Representative EGFP fluorescence images of lung tissue samples demonstrating that the adenoviral vector was successfully infected in the lung tissue. I/R, ischemia/reperfusion; NC, negative control; miR, microRNA; EGFP, enhanced green fluorescent protein.

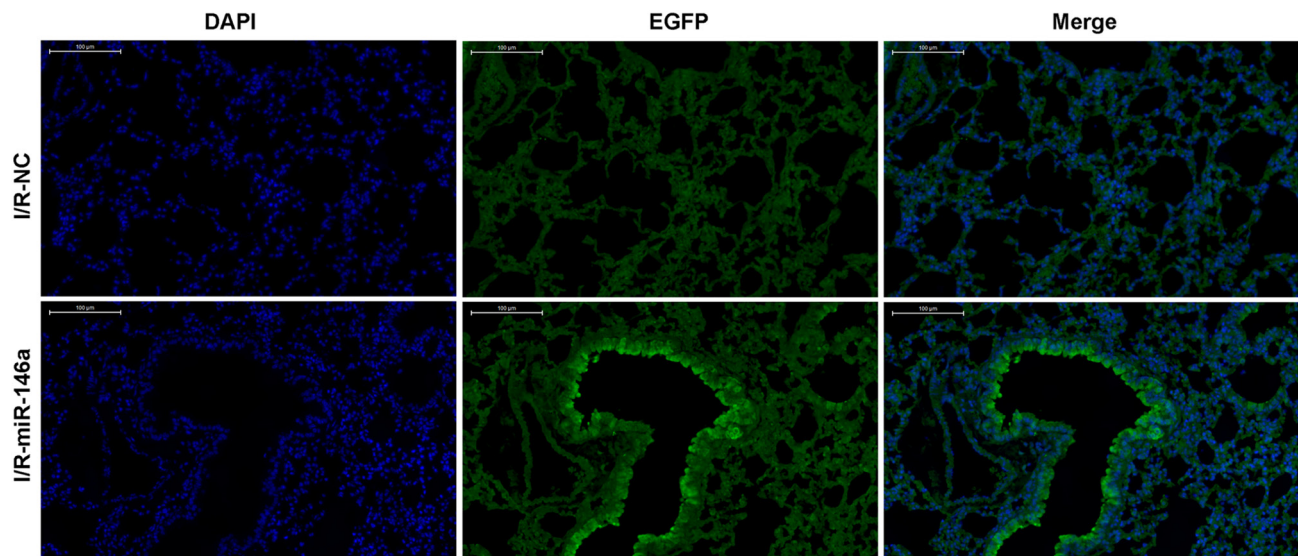

Supplement: Supplementary file 1 [file downloadSupplementary]
